# Supplementary material for: Accountable attribute-based authentication with fine-grained access control and its application to crowdsourcing
Source: Springer Nature journal article supplement (doi:10.1007/s11704-021-0593-4), 2022-08-08
Supplement: 11704_2021_593_MOESM1_ESM.pdf [file 11704_2021_593_MOESM1_ESM.pdf]

# Accountable Attribute-based Authentication with Fine-Grained Access Control and its Application to Crowdsourcing

**Peng LI, Junzuo LAI, Yongdong WU**

Frontiers of Computer Science, DOI: [10.1007/s11704-021-0593-4](https://doi.org/10.1007/s11704-021-0593-4)

# Problems & Ideas

- Problems of previous anonymous authentication schemes with access control
  - traceability is always performed by the trusted authority
  - anonymity, access control and public traceability cannot be achieved simultaneously
- Ideas: Accountable attribute-based authentication with fine-grained access control
  - Achieve public accountability without the help of any authority when a malicious user attempts to authenticate twice
  - Design the authentication mechanism ensuring anonymity, access control, linking and tracing at the same time

# Main Contributions

- An accountable attribute-based authentication with fine-grained access control is given
- We formalize the security requirements, then give a generic construction and prove the security
- We propose a new crowdsourcing scheme on blockchain
